# Supplementary material for: Maternal transmission of SARS‐COV‐2 to the neonate, and possible routes for such transmission: a systematic review and critical analysis
Source: PubMed Central journal article supplement (PMC7323034; doi:10.1111/1471-0528.16362), 2020-07-22
Supplement: BJO-127-1324-s008.pdf [file BJO-127-1324-s008.pdf]

**Table S1.** Virology results and summary of cases for babies with possible vertical transmission

|                                                           | Case 1                                                                                                                        | Case 2                                                                                                      | Case 3                                                                                                                                                                                                                                                                                                                                                                                                           | Case 4                                                                                                                                                                                           | Case 5                                                                                                                                                                                                                                                                            | Case 6                                                                          | Case 7                                                                        | Case 8                                                                 | Case 9                                     | Cases 10-21                       | Case 22                                                                                                   | Case 23                                                                                                                                                                                                               | Case 24                                                                            | Case 25-28                    |
|-----------------------------------------------------------|-------------------------------------------------------------------------------------------------------------------------------|-------------------------------------------------------------------------------------------------------------|------------------------------------------------------------------------------------------------------------------------------------------------------------------------------------------------------------------------------------------------------------------------------------------------------------------------------------------------------------------------------------------------------------------|--------------------------------------------------------------------------------------------------------------------------------------------------------------------------------------------------|-----------------------------------------------------------------------------------------------------------------------------------------------------------------------------------------------------------------------------------------------------------------------------------|---------------------------------------------------------------------------------|-------------------------------------------------------------------------------|------------------------------------------------------------------------|--------------------------------------------|-----------------------------------|-----------------------------------------------------------------------------------------------------------|-----------------------------------------------------------------------------------------------------------------------------------------------------------------------------------------------------------------------|------------------------------------------------------------------------------------|-------------------------------|
| <b>Study (Appendix A)</b>                                 | 8                                                                                                                             | 8                                                                                                           | 8                                                                                                                                                                                                                                                                                                                                                                                                                | 15                                                                                                                                                                                               | 51                                                                                                                                                                                                                                                                                | 67                                                                              | 70                                                                            | 76                                                                     | 79                                         | 92                                | 100                                                                                                       | 103                                                                                                                                                                                                                   | 111                                                                                | 117                           |
| <b>Mode of delivery</b>                                   | CS                                                                                                                            | CS                                                                                                          | CS                                                                                                                                                                                                                                                                                                                                                                                                               | CS                                                                                                                                                                                               | CS                                                                                                                                                                                                                                                                                | CS                                                                              | CS                                                                            | CS                                                                     | NVD                                        | 4 NVD<br>8 CS                     | CS                                                                                                        | CS                                                                                                                                                                                                                    | CS                                                                                 | 3 NVD<br>1 CS                 |
| <b>Gestational age at delivery</b>                        | 40                                                                                                                            | 40                                                                                                          | 31                                                                                                                                                                                                                                                                                                                                                                                                               | 39                                                                                                                                                                                               | 33                                                                                                                                                                                                                                                                                | 30                                                                              | 32                                                                            | 37                                                                     | 37                                         | Not reporter for individual cases | 26                                                                                                        | 35                                                                                                                                                                                                                    | 27                                                                                 | Not reported                  |
| <b>Birthweight</b>                                        | 3250                                                                                                                          | 3360                                                                                                        | 1580                                                                                                                                                                                                                                                                                                                                                                                                             | 3250                                                                                                                                                                                             | 2970                                                                                                                                                                                                                                                                              | Not reported                                                                    | 2350                                                                          | 3390                                                                   | 3120                                       | Not reporter for individual cases | 970                                                                                                       | 2930                                                                                                                                                                                                                  |                                                                                    | Not reported                  |
| <b>Details of mother-infant interaction post delivery</b> | Strict infection prevention and control Procedures were implemented during the delivery. No further details                   | Strict infection prevention and control procedures were implemented during the delivery. No further details | Strict infection prevention and control procedures were implemented during the delivery. No further details                                                                                                                                                                                                                                                                                                      | Not reported                                                                                                                                                                                     | Immediately separated. No delayed cord clamping or skin to skin. Intubated in another room                                                                                                                                                                                        | Immediately separated                                                           | Immediately separated                                                         | Immediately separated until D5. Returned home with mother on D5.       | Immediately separated                      | Not reported                      | Immediately separated from mother, but skin to skin contact on D6 prior to positive swab result in mother | Immediately separated before cleansing and swabs taken, then returned to mother                                                                                                                                       | Immediately separated                                                              | No separation, rooming in     |
| <b>Infant feeding</b>                                     | Not reported                                                                                                                  | Not reported                                                                                                | Not reported                                                                                                                                                                                                                                                                                                                                                                                                     | Not reported                                                                                                                                                                                     | Formula fed                                                                                                                                                                                                                                                                       | Formula fed                                                                     | Formula fed                                                                   | Formula fed from D0-D5. Mother breast fed from D5 while wearing a mask | Not reported                               | Not reported                      | Expressed breast milk until positive diagnosis in mother                                                  | Breast fed with a surgical mask                                                                                                                                                                                       | Not reported                                                                       | Breast feeding                |
| <b>Infant condition</b>                                   | D2 infant experienced lethargy and fever, with unremarkable physical examination results, moved to NICU. CXR showed pneumonia | Presented with lethargy, vomiting, and fever. A physical examination was unremarkable. CXR showed pneumonia | Resuscitation was required. The infant's Apgar scores were 3, 4, and 5 at 1, 5, and 10 minutes after birth. Neonatal respiratory distress syndrome and pneumonia confirmed by chest radiographic image on admission resolved on day 14 of life after treatment with non-invasive ventilation, caffeine, and antibiotics. He also had suspected sepsis, with an Enterobacter agglomerates-positive blood culture, | Mild shortness of breath. Chest x-ray revealed mild pulmonary infection. The shortness of breath relieved quickly under neonatal care and monitoring. The neonate was discharged after two weeks | Apgar's scores of 6 and 8 at 1 and 5 minutes. Required intubation due to general depressed state. Required ventilatory support for 12 hours, then extubated and placed on continuous positive airway pressure, with favourable outcome and not requiring antibiotic treatment. D6 | Intubated for prematurity. Developed pneumonia D2. Remains intubated and stable | Apgar scores of 8 and 9 at 1 and 5 minutes. Required antibiotics for pyrexia. | Normal Apgars, asymptomatic, remained well                             | Normal Apgars, asymptomatic, remained well | Not reporter for individual cases | Complications of prematurity but no signs of infection                                                    | Apgar scores were 9 at 1 minute and 9 at 5 minutes. Required admission to NICU at 36 hours for hypoglycaemia and feeding difficulties. Empirically treated with antibiotics, negative septic screen. Discharged day 4 | Apgar scores of 1, 3 and 6 at 1, 5 and 10 min respectively. No infectious symptoms | None had respiratory symptoms |



**Table S2.** Risk of bias assessment

| Paper | Appendix<br>A<br>STUDY<br>NO. | Bias 1<br>All pregnant patients with SARS-CoV2 | Bias 2<br>All pregnant patients with COVID-19 infection (symptomatic) | Bias 3<br>All pregnant patients with COVID-19 admitted to / in (a/any) hospital | Baby testing bias |
|-------|-------------------------------|------------------------------------------------|-----------------------------------------------------------------------|---------------------------------------------------------------------------------|-------------------|
|       |                               | *H, L or U                                     | *H, L or U                                                            | *H, L or U                                                                      | *H, L or U        |

\*H (high); L (Low); U (no data)

**China**

|                                                                                                      |        |   |   |                                             |              |
|------------------------------------------------------------------------------------------------------|--------|---|---|---------------------------------------------|--------------|
| Zongnan Hospital of Wuhan University grid.413247.7                                                   | 1      | H | H | H                                           | U            |
| Wuhan Children’s Hospital<br>Maternal and Child Hospital of Hubei Province                           | 8, 30  | H | H | L (neonates)<br>H (mothers; unclear)        | L            |
| Union Hospital, Tongji Medical College, Huazhong University of Science and Technology grid.412839.5  | 2a, 6  | H | H | L (noting duplicate reports)                | H (2a)       |
| Tongji Hospital, Tongji Medical College, Huazhong University of Science and Technology grid.412793.a | 15     | H | H | L                                           | H            |
| First Affiliated Hospital of Sun Yat-sen University                                                  | 3      | H | H | H (too many hospitals)                      | H            |
| Renmin Hospital of Wuhan University grid.412632.0                                                    | 36, 37 | H | H | H (impossible - due to overlapping reports) | H            |
| Affiliated Infectious Hospital of Soochow University, Suzhou.                                        | 19     | H | H | H                                           | H (one case) |
| Beijing YouAn Hospital                                                                               | 34     | H | H | H                                           | H (one case) |
| No. 2 People’s Hospital of Hefei City Affiliated to Anhui Medical University                         | 62     | H | H | H                                           | H (one case) |

**USA**

|                                              |          |   |   |                                 |              |
|----------------------------------------------|----------|---|---|---------------------------------|--------------|
| New York Presbyterian & Columbia             | 27 (+14) | H | H | L                               | L            |
| MedStar Washington Hospital Center           | 21       | H | H | H                               | H (one case) |
| Good Samaritan hospital, Ohio                | 50       | H | H | H                               | H (one case) |
| Hospital of the University of Pennsylvania   | 65       | H | H | H (series/ only critically ill) | U            |
| Washington University in St. Louis, Missouri | 69       | H | H | H                               | H            |
| New York Winthrop Hospital                   | 91       | H | H | H                               | H (one case) |
| New York University, Langone Health          | 85       | H | H | L                               | H            |

|                                     |     |   |   |   |              |
|-------------------------------------|-----|---|---|---|--------------|
| San Francisco                       | 89  | H | H | H | H            |
| Livingstone, New Jersey             | 111 | H | H | H | H (twins)    |
| Stanford University Hospital        | 115 | H | H | H | H (one case) |
| Weill Cornell Medicine, New York    | 118 | H | H | H | H (one case) |
| Michigan                            | 123 | H | H | L | L            |
| Maimonides Medical Center, Brooklyn | 113 | H | H | L | L            |

#### Honduras

|                                 |    |   |   |   |              |
|---------------------------------|----|---|---|---|--------------|
| Hospital Escuela of Tegucigalpa | 18 | H | H | H | H (one case) |
|---------------------------------|----|---|---|---|--------------|

#### Sweden

|                                      |    |   |   |   |              |
|--------------------------------------|----|---|---|---|--------------|
| Southern General Hospital, Stockholm | 20 | H | H | H | H (one case) |
|--------------------------------------|----|---|---|---|--------------|

#### Korea

|                        |    |   |   |   |              |
|------------------------|----|---|---|---|--------------|
| Daegu Fatimal Hospital | 22 | H | H | H | H (one case) |
|------------------------|----|---|---|---|--------------|

#### Turkey

|                   |    |   |   |   |              |
|-------------------|----|---|---|---|--------------|
| Ankara University | 31 | H | H | H | H (one case) |
|-------------------|----|---|---|---|--------------|

#### Italy

|                                                                   |     |   |   |   |              |
|-------------------------------------------------------------------|-----|---|---|---|--------------|
| IRCCS Fondazione Policlinico Universitario Agostino Gemelli, Rome | 76  | H | H | L | H (2 cases)  |
| Sant'Anna Hospital, Turin                                         | 79  | H | H | H | H (one case) |
| Parma                                                             | 109 | H | H | H | H            |
| Italian hospitals                                                 | 117 | H | H | L | L            |

#### Portugal

|                                       |     |   |   |   |   |
|---------------------------------------|-----|---|---|---|---|
| Hospital Pedro Hispano in Porto (105) | 105 | H | H | L | L |
|---------------------------------------|-----|---|---|---|---|

#### Australia

|                                |    |   |   |   |              |
|--------------------------------|----|---|---|---|--------------|
| Gold Coast University Hospital | 45 | H | H | H | H (one case) |
|--------------------------------|----|---|---|---|--------------|

**Canada**

|                            |     |   |   |   |   |
|----------------------------|-----|---|---|---|---|
| Mount Sinai Hospital Study | 48A | H | H | H | U |
|----------------------------|-----|---|---|---|---|

**France**

|                                    |     |   |   |   |   |
|------------------------------------|-----|---|---|---|---|
| Antoine Béclère hospital Study 48B | 48B | H | H | H | U |
|------------------------------------|-----|---|---|---|---|

**Spain**

|        |     |   |   |   |   |
|--------|-----|---|---|---|---|
| Madrid | 125 | H | H | L | L |
|--------|-----|---|---|---|---|

**Peru**

|                                    |    |   |   |   |              |
|------------------------------------|----|---|---|---|--------------|
| British American Hospital Study 51 | 51 | H | H | H | H (one case) |
|------------------------------------|----|---|---|---|--------------|

**India**

|                           |    |   |   |   |              |
|---------------------------|----|---|---|---|--------------|
| Designated COVID hospital | 58 | H | H | H | H (one case) |
|---------------------------|----|---|---|---|--------------|

**Iran**

|                              |     |   |   |   |              |
|------------------------------|-----|---|---|---|--------------|
| Vali-e-asr Hospital, Zanjan  | 43  | H | H | H | U            |
| Tehran/Rasht/Qom/Zanjan      | 67  | H | H | H | H            |
| Imam Khomeini Hospital, Sari | 70  | H | H | H | H (one case) |
| Imam Reza hospital of Tabriz | 101 | H | H | H | H (one case) |

**UK**

|       |    |   |   |   |   |
|-------|----|---|---|---|---|
| UKOSS | 92 | H | H | L | H |
|-------|----|---|---|---|---|

**Belgium**

|                                    |     |   |   |   |   |
|------------------------------------|-----|---|---|---|---|
| Cliniques Universitaires Saint Luc | 100 | H | H | H | H |
|------------------------------------|-----|---|---|---|---|

**Netherlands**

|         |     |   |   |   |   |
|---------|-----|---|---|---|---|
| NethOSS | 141 | H | H | L | H |
|---------|-----|---|---|---|---|
