# Supplementary material for: Maternal transmission of SARS‐COV‐2 to the neonate, and possible routes for such transmission: a systematic review and critical analysis
Source: PubMed Central journal article supplement (PMC7323034; doi:10.1111/1471-0528.16362), 2020-07-22
Supplement: BJO-127-1324-s009.pdf [file BJO-127-1324-s009.pdf]

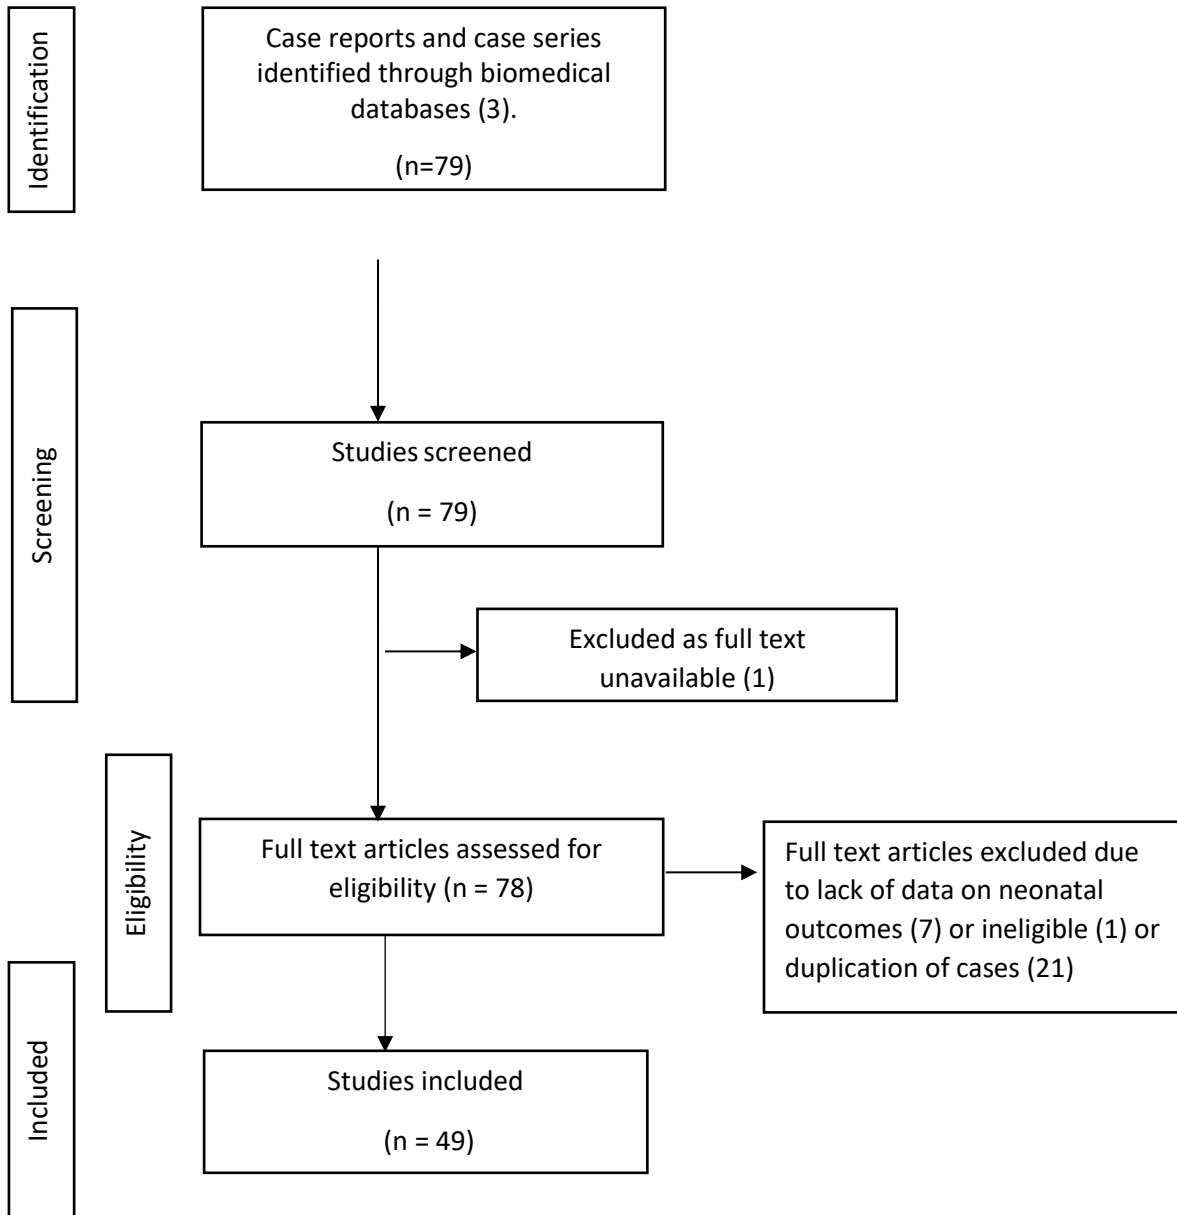

**Figure S1.** Study flow chart.
